# Supplementary material for: A Bayesian variable selection procedure to rank overlapping gene sets
Source: Springer Nature journal article supplement (doi:10.1186/1471-2105-13-73), 2012-05-03

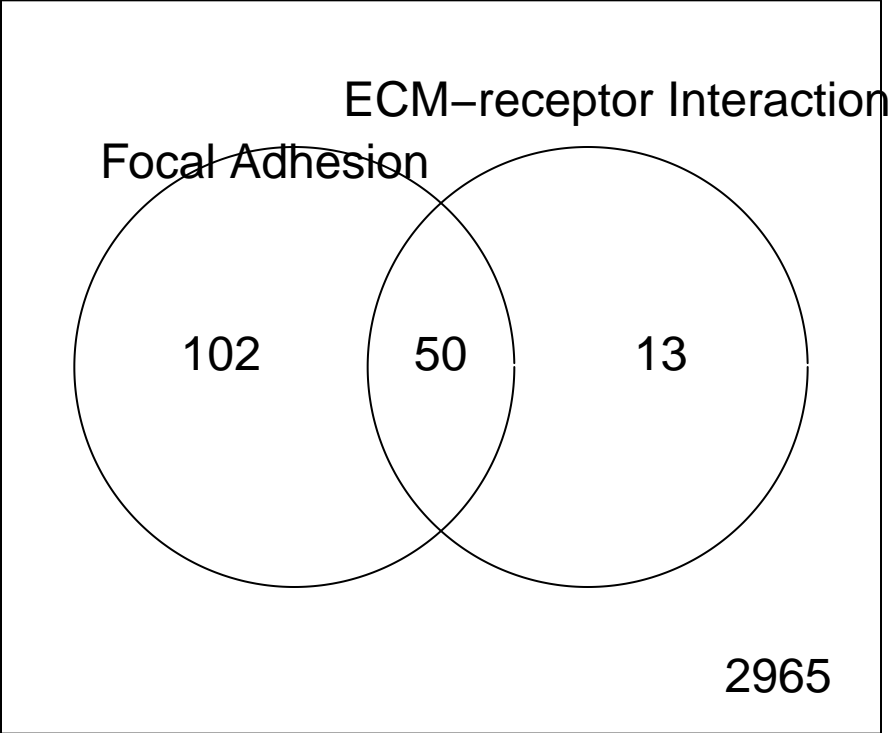

Supplement: 12859_2011_5310_MOESM4_ESM.pdf [file 12859_2011_5310_MOESM4_ESM.pdf]
