# Supplementary material for: A Bayesian variable selection procedure to rank overlapping gene sets
Source: Springer Nature journal article supplement (doi:10.1186/1471-2105-13-73), 2012-05-03

# Color Key

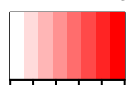

0 0.4 1  
Value

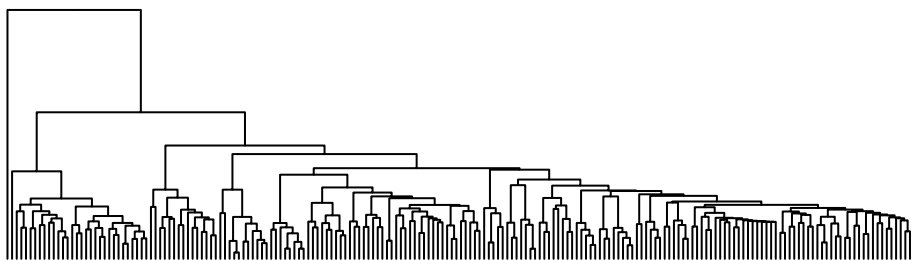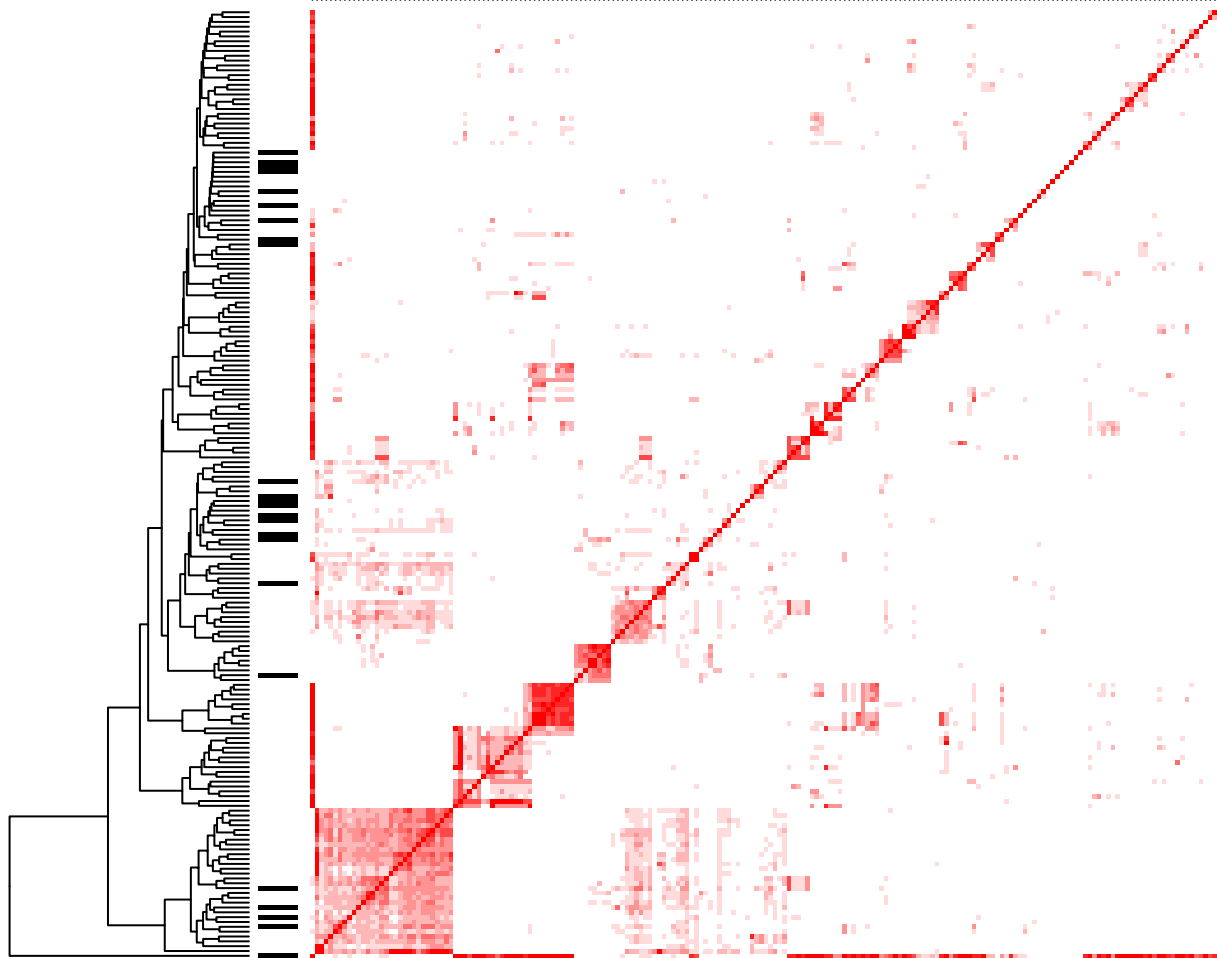

Supplement: 12859_2011_5310_MOESM5_ESM.pdf [file 12859_2011_5310_MOESM5_ESM.pdf]
